# Supplementary material
Source: PubMed Central journal article supplement (PMC3346413)
Supplement: supp_78.11.3975_AEM-AEM07835-11-s01.pdf [file supp_78.11.3975_AEM-AEM07835-11-s01.pdf]

## LEGENDS TO FIGURES

Fig. S1.

Characterization of strain #7 *C. sakazakii* DPC 6523 (black) and its counterpart complemented with a functional *rpoS* gene (grey).

(A) Catalase activity (decrease in OD<sub>240 nm</sub> after incubation with 40 mM H<sub>2</sub>O<sub>2</sub>)

(B) Growth curves in M9 broth supplemented with 0.4 % acetate

(C) Inactivation rate (log CFU/mL) after lethal acid (60 min at pH 2.5), alkaline (60 min at pH 11.0), osmotic (dehydration for 8 days at room temperature), oxidative (60 min at 30 mM H<sub>2</sub>O<sub>2</sub>) and heat treatments (5 min at 60° C)

(D) Growth capacity (Time To Detection) under sublethal acid (pH 4.0), alkaline (pH 9.75), osmotic (7% NaCl), oxidative (4 mM H<sub>2</sub>O<sub>2</sub>) and heat (45°C) stress conditions.

\*The complemented strain is significantly different to its counterpart (p<0.05)

\*\*The complemented strain is significantly different to its counterpart (p<0.01)

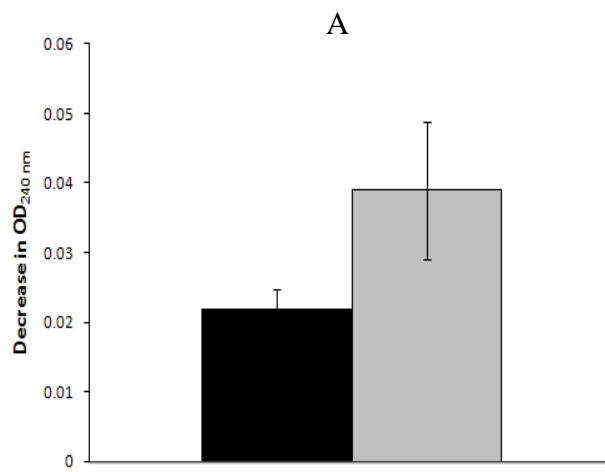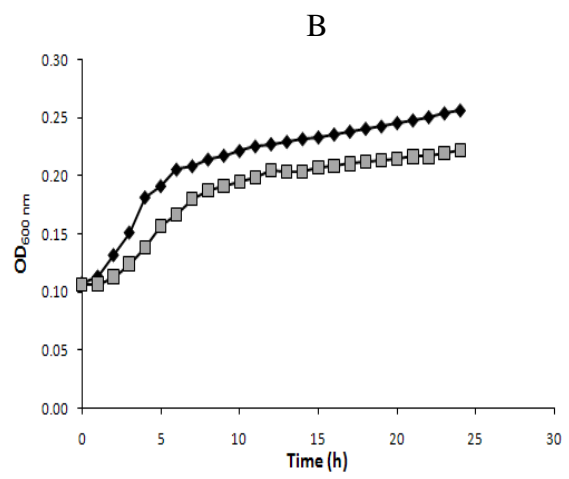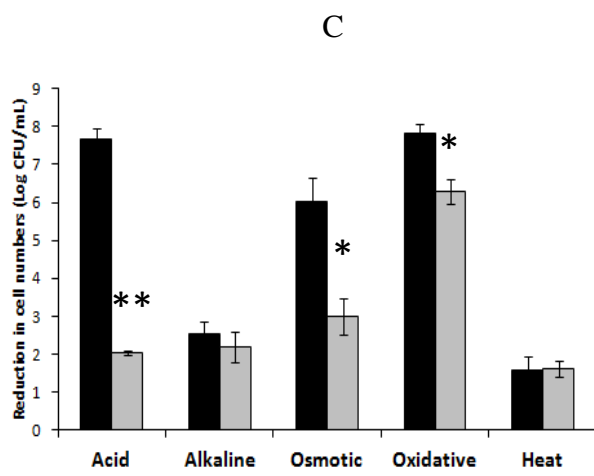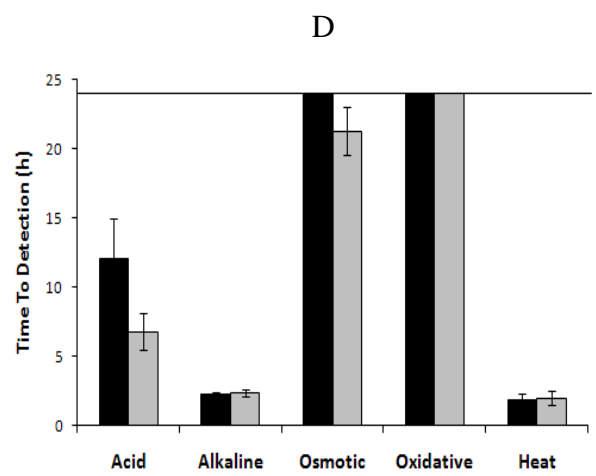

Fig. S1. Álvarez-Ordóñez et al.
